# Supplementary material for: Identification of Ethnically Specific Genetic Variations in Pan-Asian Ethnos
Source: PubMed Central journal article supplement — Genomics Inform. 2014 Mar 31;12(1):42–7. doi: 10.5808/GI.2014.12.1.42 (PMC3990765; doi:10.5808/gi.2014.12.1.42), 2014-03-31
Supplement: gni-12-42-s002.pdf [file gni-12-42-s002.pdf]

**Supplementary Table 1.** Ethnic groups list in Pan Asia (assign Ethnic group as like "two country-two ethnic group") and HapMap populations

| Abbreviation of ethnic group | Ethnicity   | Abbreviation of ethnic group | Ethnicity          | Abbreviation of ethnic group | Ethnicity |
|------------------------------|-------------|------------------------------|--------------------|------------------------------|-----------|
| AX-AI                        | Karitiana   | ID-SU                        | Sunda              | PI-MA                        | Minanubu  |
| AX-AM                        | Ami         | ID-TB                        | Batak Toba         | PI-MW                        | Mamanwa   |
| AX-AT                        | Atayal      | ID-TR                        | Toraja             | PI-UB                        | Filipino  |
| AX-ME                        | Melanesians | IN-DR                        | Proto-Austroloids  | PI-UI                        | Filipino  |
| CEU                          | European    | IN-EL                        | Caucasoids         | PI-UN                        | Filipino  |
| CHB                          | Han         | IN-IL                        | Caucasoids         | SG-CH                        | Chinese   |
| CN-CC                        | Zhuang      | IN-NI                        | Mongoloid features | SG-ID                        | Indian    |
| CN-GA                        | Han         | IN-NL                        | Caucasoids         | SG-ML                        | Malay     |
| CN-HM                        | Hmong       | IN-SP                        | Caucasoids         | TH-HM                        | Hmong     |
| CN-JI                        | Jiamao      | IN-TB                        | Mongoloid features | TH-KA                        | Karen     |
| CN-JN                        | Jinuo       | IN-WI                        | Caucasoids         | TH-LW                        | Lawa      |
| CN-SH                        | Han         | IN-WL                        | Caucasoids         | TH-MA                        | Mlabri    |
| CN-UG                        | Uyghur      | JP-ML                        | Japanese           | TH-MO                        | Mon       |
| CN-WA                        | Wa          | JP-RK                        | Ryukyuan           | TH-PL                        | Paluang   |
| ID-AL                        | Alorese     | JPT                          | Japanese           | TH-PP                        | Plang     |
| ID-DY                        | Dayak       | KR-KR                        | Koreans            | TH-TK                        | Tai Khuen |
| ID-JA                        | Javanese    | MY-BD                        | Bidayuh            | TH-TL                        | Tai Lue   |
| ID-JV                        | Javanese    | MY-JH                        | Negrito            | TH-TN                        | H'tin     |
| ID-KR                        | Batak Karo  | MY-KN                        | Malay              | TH-TU                        | Tai Yuan  |
| ID-LA                        | Lamaholot   | MY-KS                        | Negrito            | TH-TY                        | Tai Yong  |
| ID-LE                        | Lembata     | MY-MN                        | Malay              | TH-YA                        | Yao       |
| ID-ML                        | Malay       | MY-TM                        | Proto-Malay        | TW-HA                        | Chinese   |
| ID-MT                        | Mentawai    | PI-AE                        | Ayta               | TW-HB                        | Chinese   |
| ID-RA                        | Manggarai   | PI-AG                        | Agta               | YRI                          | Yoruba    |
| ID-SB                        | Kambera     | PI-AT                        | Ati                |                              |           |
| ID-SO                        | Manggarai   | PI-IR                        | Iraya              |                              |           |

AX, Affymetrix Inc. (not country); CN, China; ID, Indonesia; IN, India; JP, Japan; KR, Korea; MY, Malaysia; PI, Philippine; SG, Singapore; TH, Thailand; TW, Taiwan.

The samples from HapMap were expressed as three codes: CEU, European sampled in America; CHB, Chinese sampled in US; JPT, Japanese sampled in Japan; YRI, Yoruba sampled in Africa.
