# Supplementary material for: Identification of Ethnically Specific Genetic Variations in Pan-Asian Ethnos
Source: PubMed Central journal article supplement — Genomics Inform. 2014 Mar 31;12(1):42–7. doi: 10.5808/GI.2014.12.1.42 (PMC3990765; doi:10.5808/gi.2014.12.1.42), 2014-03-31
Supplement: gni-12-42-s003.pdf [file gni-12-42-s003.pdf]

**Supplementary Table 2.** ESNP- and ECNP-related genes list

| ESNP-related genes | Description                                                                        | Location            |
|--------------------|------------------------------------------------------------------------------------|---------------------|
| <i>PCCA</i>        | Propionyl CoA carboxylase, alpha polypeptide                                       | Cytoplasm           |
| <i>IGHMBP2</i>     | Immunoglobulin mu binding protein 2                                                | Nucleus             |
| <i>RNF43</i>       | Ring finger protein 43                                                             | Plasma membrane     |
| <i>ALAD</i>        | Aminolevulinate dehydratase                                                        | Cytoplasm           |
| <i>CS</i>          | Citrate synthase                                                                   | Cytoplasm           |
| <i>CARS2</i>       | Cysteinyl-tRNA synthetase 2, mitochondrial (putative)                              | Cytoplasm           |
| <i>TPO</i>         | Thyroid peroxidase                                                                 | Plasma membrane     |
| <i>RGS7</i>        | Regulator of G-protein signaling 7                                                 | Cytoplasm           |
| <i>PLA2G4C</i>     | Phospholipase A2, group IVC (cytosolic, calcium-independent)                       | Plasma membrane     |
| <i>LYPLA1</i>      | Lysophospholipase I                                                                | Cytoplasm           |
| <i>BRIP1</i>       | BRCA1 interacting protein C-terminal helicase 1                                    | Nucleus             |
| <i>PJA2</i>        | Praja ring finger 2, E3 ubiquitin protein ligase                                   | Cytoplasm           |
| <i>*SEP9</i>       | Septin 9                                                                           | Cytoplasm           |
| <i>GBE1</i>        | Glucan (1,4-alpha-), branching enzyme 1                                            | Cytoplasm           |
| <i>ZNRF1</i>       | Zinc and ring finger 1, E3 ubiquitin protein ligase                                | Cytoplasm           |
| <i>TP53I3</i>      | Tumor protein p53 inducible protein 3                                              | Other               |
| <i>UBR2</i>        | Ubiquitin protein ligase E3 component n-recognin 2                                 | Nucleus             |
| <i>TDP1</i>        | Tyrosyl-DNA phosphodiesterase 1                                                    | Nucleus             |
| <i>EMR3</i>        | Egf-like module containing, mucin-like, hormone receptor-like 3                    | Plasma membrane     |
| <i>LPHN3</i>       | Latrophilin 3                                                                      | Plasma membrane     |
| <i>LTBP4</i>       | Latent transforming growth factor beta binding protein 4                           | Extracellular space |
| <i>KCNMA1</i>      | Potassium large conductance calcium-activated channel, subfamily M, alpha member 1 | Plasma membrane     |
| <i>PRKCE</i>       | Protein kinase C, epsilon                                                          | Cytoplasm           |
| <i>GOLGA5</i>      | Golgin A5                                                                          | Cytoplasm           |
| <i>ITPK1</i>       | Inositol-tetrakisphosphate 1-kinase                                                | Cytoplasm           |
| <i>ITPKB</i>       | Inositol-trisphosphate 3-kinase B                                                  | Cytoplasm           |
| <i>MYLK3</i>       | Myosin light chain kinase 3                                                        | Cytoplasm           |
| <i>GRK5</i>        | G protein-coupled receptor kinase 5                                                | Plasma membrane     |
| <i>IPPK</i>        | Inositol 1,3,4,5,6-pentakisphosphate 2-kinase                                      | Cytoplasm           |
| <i>PRKD2</i>       | Protein kinase D2                                                                  | Cytoplasm           |
| <i>GALK2</i>       | Galactokinase 2                                                                    | Cytoplasm           |
| <i>PKIA</i>        | Protein kinase (cAMP-dependent, catalytic) inhibitor alpha                         | Cytoplasm           |
| <i>GRAP2</i>       | GRB2-related adaptor protein 2                                                     | Cytoplasm           |

**Supplementary Table 2. Continued.**

| ESNP-related genes  | Description                                                         | Location            |
|---------------------|---------------------------------------------------------------------|---------------------|
| <i>FAM107B</i>      | Family with sequence similarity 107, member B                       | Other               |
| <i>LRRC20</i>       | Leucine rich repeat containing 20                                   | Other               |
| <i>SMEK1</i>        | SMEK homolog 1, suppressor of mek1 (Dictyostelium)                  | Plasma membrane     |
| <i>FBXW4</i>        | F-box and WD repeat domain containing 4                             | Other               |
| <i>RALGPS1</i>      | Ral GEF with PH domain and SH3 binding motif 1                      | Cytoplasm           |
| <i>AHRR</i>         | Aryl-hydrocarbon receptor repressor                                 | Nucleus             |
| <i>SLC17A9</i>      | Solute carrier family 17, member 9                                  | Other               |
| <i>TMEM143</i>      | Transmembrane protein 143                                           | Cytoplasm           |
| <i>CAMTA1</i>       | Calmodulin binding transcription activator 1                        | Other               |
| <i>CUL9</i>         | Cullin 9                                                            | Cytoplasm           |
| <i>MSL1</i>         | Male-specific lethal 1 homolog (Drosophila)                         | Nucleus             |
| <i>FAM118A</i>      | Family with sequence similarity 118, member A                       | Other               |
| <i>TMEM170A</i>     | Transmembrane protein 170A                                          | Other               |
| <i>TUBGCP3</i>      | Tubulin, gamma complex associated protein 3                         | Cytoplasm           |
| <i>NIPSNAP3A</i>    | Nipsnap homolog 3A (C. elegans)                                     | Cytoplasm           |
| <i>CARD8</i>        | Caspase recruitment domain family, member 8                         | Nucleus             |
| <i>LOC100506325</i> | Uncharacterized LOC100506325                                        | Other               |
| <i>PROS1</i>        | Protein S (alpha)                                                   | Extracellular space |
| <i>SETBP1</i>       | SET binding protein 1                                               | Nucleus             |
| <i>ECM2</i>         | Extracellular matrix protein 2, female organ and adipocyte specific | Extracellular space |
| <i>FAT4</i>         | FAT atypical cadherin 4                                             | Other               |
| <i>DCUN1D2</i>      | DCN1, defective in cullin neddylation 1, domain containing 2        | Other               |
| <i>COL23A1</i>      | Collagen, type XXIII, alpha 1                                       | Plasma membrane     |
| <i>C17orf67</i>     | Chromosome 17 open reading frame 67                                 | Other               |
| <i>COL26A1</i>      | Collagen, type XXVI, alpha 1                                        | Extracellular space |
| <i>FAM196A</i>      | Family with sequence similarity 196, member A                       | Other               |
| <i>URGCP</i>        | Upregulator of cell proliferation                                   | Cytoplasm           |
| <i>SPON1</i>        | Spondin 1, extracellular matrix protein                             | Extracellular space |
| <i>ANK2</i>         | Ankyrin 2, neuronal                                                 | Plasma membrane     |
| <i>RFC2</i>         | Replication factor C (activator 1) 2, 40kDa                         | Nucleus             |
| <i>ABLIM2</i>       | Actin binding LIM protein family, member 2                          | Cytoplasm           |
| <i>KIAA0930</i>     | KIAA0930                                                            | Other               |

**Supplementary Table 2. Continued.**

| ESNP-related genes  | Description                                                                          | Location            |
|---------------------|--------------------------------------------------------------------------------------|---------------------|
| <i>ELN</i>          | Elastin                                                                              | Extracellular space |
| <i>SUMO3</i>        | Small ubiquitin-like modifier 3                                                      | Nucleus             |
| <i>ARFGEF1</i>      | ADP-ribosylation factor guanine nucleotide-exchange factor 1 (brefeldin A-inhibited) | Cytoplasm           |
| <i>FAM13B</i>       | Family with sequence similarity 13, member B                                         | Cytoplasm           |
| <i>SPACA7</i>       | Sperm acrosome associated 7                                                          | Cytoplasm           |
| <i>MEI1</i>         | Meiosis inhibitor 1                                                                  | Other               |
| <i>ZC3H4</i>        | Zinc finger CCCH-type containing 4                                                   | Other               |
| <i>FBXL20</i>       | F-box and leucine-rich repeat protein 20                                             | Cytoplasm           |
| <i>MBP</i>          | Myelin basic protein                                                                 | Extracellular space |
| <i>KIAA1244</i>     | KIAA1244                                                                             | Cytoplasm           |
| <i>COLGALT1</i>     | Collagen beta(1-O)galactosyltransferase 1                                            | Cytoplasm           |
| <i>ZBTB46</i>       | Zinc finger and BTB domain containing 46                                             | Nucleus             |
| <i>KDM4B</i>        | Lysine (K)-specific demethylase 4B                                                   | Other               |
| <i>WDR89</i>        | WD repeat domain 89                                                                  | Other               |
| <i>SH3BP2</i>       | SH3-domain binding protein 2                                                         | Cytoplasm           |
| <i>GTDC1</i>        | Glycosyltransferase-like domain containing 1                                         | Other               |
| <i>MTMR11</i>       | Myotubularin related protein 11                                                      | Other               |
| <i>HCG18</i>        | HLA complex group 18 (non-protein coding)                                            | Other               |
| <i>CHGA</i>         | Chromogranin A (parathyroid secretory protein 1)                                     | Cytoplasm           |
| <i>GLG1</i>         | Golgi glycoprotein 1                                                                 | Cytoplasm           |
| <i>LOC285972</i>    | Uncharacterized LOC285972                                                            | Other               |
| <i>EVI5</i>         | Ecotropic viral integration site 5                                                   | Other               |
| <i>LOC100130172</i> | Uncharacterized LOC100130172                                                         | Other               |
| <i>DIDO1</i>        | Death inducer-obliterator 1                                                          | Nucleus             |
| <i>PHF20</i>        | PHD finger protein 20                                                                | Nucleus             |
| <i>PDZD2</i>        | PDZ domain containing 2                                                              | Plasma membrane     |
| <i>CEP192</i>       | Centrosomal protein 192kDa                                                           | Cytoplasm           |
| <i>TRMT44</i>       | tRNA methyltransferase 44 homolog ( <i>S. cerevisiae</i> )                           | Other               |
| <i>RIN3</i>         | Ras and Rab interactor 3                                                             | Cytoplasm           |

**Supplementary Table 2. Continued.**

| ESNP-related genes  | Description                                                | Location            |
|---------------------|------------------------------------------------------------|---------------------|
| <i>NF1</i>          | Neurofibromin 1                                            | Cytoplasm           |
| <i>CENPM</i>        | Centromere protein M                                       | Cytoplasm           |
| <i>CPLX2</i>        | Complexin 2                                                | Cytoplasm           |
| <i>ERC1</i>         | ELKS/RAB6-interacting/CAST family member 1                 | Cytoplasm           |
| <i>VWA3B</i>        | Von Willebrand factor A domain containing 3B               | Other               |
| <i>LRRC36</i>       | Leucine rich repeat containing 36                          | Other               |
| <i>UTS2</i>         | Urotensin 2                                                | Extracellular space |
| <i>COL28A1</i>      | Collagen, type XXVIII, alpha 1                             | Extracellular space |
| <i>TNRC6C</i>       | Trinucleotide repeat containing 6C                         | Cytoplasm           |
| <i>EFCAB11</i>      | EF-hand calcium binding domain 11                          | Other               |
| <i>CCNY</i>         | Cyclin Y                                                   | Nucleus             |
| <i>VOPP1</i>        | Vesicular, overexpressed in cancer, prosurvival protein 1  | Nucleus             |
| <i>NLRC3</i>        | NLR family, CARD domain containing 3                       | Cytoplasm           |
| <i>FCHO1</i>        | FCH domain only 1                                          | Plasma membrane     |
| <i>LOC100506172</i> | Uncharacterized LOC100506172                               | Other               |
| <i>TUBGCP6</i>      | Tubulin, gamma complex associated protein 6                | Cytoplasm           |
| <i>C1orf54</i>      | Chromosome 1 open reading frame 54                         | Other               |
| <i>RASGRF1</i>      | Ras protein-specific guanine nucleotide-releasing factor 1 | Cytoplasm           |
| <i>MADD</i>         | MAP-kinase activating death domain                         | Cytoplasm           |
| <i>ZNF484</i>       | Zinc finger protein 484                                    | Nucleus             |
| <i>ACTR3C</i>       | ARP3 actin-related protein 3 homolog C (yeast)             | Other               |
| <i>PRC1</i>         | Protein regulator of cytokinesis 1                         | Nucleus             |
| <i>TBC1D22A</i>     | TBC1 domain family, member 22A                             | Other               |
| <i>OTUD7B</i>       | OTU domain containing 7B                                   | Cytoplasm           |
| <i>CASP9</i>        | Caspase 9, apoptosis-related cysteine peptidase            | Cytoplasm           |
| <i>AEBP1</i>        | AE binding protein 1                                       | Nucleus             |
| <i>PTPRA</i>        | Protein tyrosine phosphatase, receptor type, A             | Plasma membrane     |
| <i>HOXD3</i>        | Homeobox D3                                                | Nucleus             |
| <i>NPAS2</i>        | Neuronal PAS domain protein 2                              | Nucleus             |

**Supplementary Table 2. Continued.**

| ESNP-related genes | Description                                                        | Location        |
|--------------------|--------------------------------------------------------------------|-----------------|
| <i>ZNF236</i>      | Zinc finger protein 236                                            | Nucleus         |
| <i>TRERF1</i>      | Transcriptional regulating factor 1                                | Nucleus         |
| <i>VAV2</i>        | Vav 2 guanine nucleotide exchange factor                           | Cytoplasm       |
| <i>ZNF174</i>      | Zinc finger protein 174                                            | Nucleus         |
| <i>GATAD2B</i>     | GATA zinc finger domain containing 2B                              | Nucleus         |
| <i>UBN1</i>        | Ubinuclein 1                                                       | Nucleus         |
| <i>RUNX3</i>       | Runt-related transcription factor 3                                | Nucleus         |
| <i>PRRX2</i>       | Paired related homeobox 2                                          | Nucleus         |
| <i>ELF1</i>        | E74-like factor 1 (ets domain transcription factor)                | Nucleus         |
| <i>MXI1</i>        | MAX interactor 1, dimerization protein                             | Nucleus         |
| <i>CERS4</i>       | Ceramide synthase 4                                                | Cytoplasm       |
| <i>KLF12</i>       | Kruppel-like factor 12                                             | Nucleus         |
| <i>EIF4E2</i>      | Eukaryotic translation initiation factor 4E family member 2        | Cytoplasm       |
| <i>EIF4H</i>       | Eukaryotic translation initiation factor 4H                        | Cytoplasm       |
| <i>UTRN</i>        | Utrophin                                                           | Plasma membrane |
| <i>ROBO1</i>       | Roundabout, axon guidance receptor, homolog 1 (Drosophila)         | Plasma membrane |
| <i>ITGB3</i>       | Integrin, beta 3 (platelet glycoprotein IIIa, antigen CD61)        | Plasma membrane |
| <i>TNFRSF9</i>     | Tumor necrosis factor receptor superfamily, member 9               | Plasma membrane |
| <i>ABCA1</i>       | ATP-binding cassette, sub-family A (ABC1), member 1                | Plasma membrane |
| <i>SMC1B</i>       | Structural maintenance of chromosomes 1B                           | Nucleus         |
| <i>XPO6</i>        | Exportin 6                                                         | Cytoplasm       |
| <i>NUP50</i>       | Nucleoporin 50kDa                                                  | Nucleus         |
| <i>MIP</i>         | Major intrinsic protein of lens fiber                              | Plasma membrane |
| <i>STX11</i>       | Syntaxin 11                                                        | Plasma membrane |
| <i>TMCO3</i>       | Transmembrane and coiled-coil domains 3                            | Other           |
| <i>VPS45</i>       | Vacuolar protein sorting 45 homolog ( <i>S. cerevisiae</i> )       | Cytoplasm       |
| <i>EXOC3</i>       | Exocyst complex component 3                                        | Plasma membrane |
| ECNP-related genes | Description                                                        | Location        |
| <i>APOBEC2</i>     | Apolipoprotein B mRNA editing enzyme, catalytic polypeptide-like 2 | Other           |
| <i>NDUFA9</i>      | NADH dehydrogenase (ubiquinone) 1 alpha subcomplex, 9, 39kDa       | Cytoplasm       |
| <i>OARD1</i>       | O-acyl-ADP-ribose deacylase 1                                      | Other           |
| <i>TOP1</i>        | Topoisomerase (DNA) I                                              | Nucleus         |

**Supplementary Table 2. Continued.**

| ECNP-related genes | Description                                            | Location            |
|--------------------|--------------------------------------------------------|---------------------|
| <i>UAP1</i>        | UDP-N-acetylglucosamine pyrophosphorylase 1            | Nucleus             |
| <i>GABRA5</i>      | Gamma-aminobutyric acid (GABA) A receptor, alpha 5     | Plasma membrane     |
| <i>GABRG3</i>      | Gamma-aminobutyric acid (GABA) A receptor, gamma 3     | Plasma membrane     |
| <i>DDR2</i>        | Discoidin domain receptor tyrosine kinase 2            | Plasma membrane     |
| <i>ALCAM</i>       | Activated leukocyte cell adhesion molecule             | Plasma membrane     |
| <i>ASTN2</i>       | Astrotactin 2                                          | Cytoplasm           |
| <i>C12orf4</i>     | Chromosome 12 open reading frame 4                     | Other               |
| <i>C1QTNF7</i>     | C1q and tumor necrosis factor related protein 7        | Extracellular space |
| <i>C3orf20</i>     | Chromosome 3 open reading frame 20                     | Cytoplasm           |
| <i>CCDC174</i>     | Coiled-coil domain containing 174                      | Other               |
| <i>COL6A4P1</i>    | Collagen, type VI, alpha 4 pseudogene 1                | Other               |
| <i>CPEB2</i>       | Cytoplasmic polyadenylation element binding protein 2  | Cytoplasm           |
| <i>DAB1</i>        | Dab, reelin signal transducer, homolog 1 (Drosophila)  | Cytoplasm           |
| <i>DLGAP3</i>      | Discs, large (Drosophila) homolog-associated protein 3 | Cytoplasm           |
| <i>FGD5</i>        | FYVE, RhoGEF and PH domain containing 5                | Cytoplasm           |
| <i>FLJ43663</i>    | Uncharacterized LOC378805                              | Other               |
| <i>FNDC1</i>       | Fibronectin type III domain containing 1               | Plasma membrane     |
| <i>GTF2H5</i>      | General transcription factor IIH, polypeptide 5        | Nucleus             |
| <i>KIAA0319L</i>   | KIAA0319-like                                          | Cytoplasm           |
| <i>LINC00111</i>   | Long intergenic non-protein coding RNA 111             | Other               |
| <i>LOC152742</i>   | Uncharacterized LOC152742                              | Other               |
| <i>LOC441009</i>   | Uncharacterized LOC441009                              | Other               |
| <i>MAG</i>         | Myelin associated glycoprotein                         | Plasma membrane     |
| <i>NUF2</i>        | NUF2, NDC80 kinetochore complex component              | Nucleus             |
| <i>RAD51AP1</i>    | RAD51 associated protein 1                             | Nucleus             |
| <i>RBFOX1</i>      | RNA binding protein, fox-1 homolog (C. elegans) 1      | Cytoplasm           |
| <i>RGS5</i>        | Regulator of G-protein signaling 5                     | Plasma membrane     |
| <i>SERAC1</i>      | Serine active site containing 1                        | Extracellular space |
| <i>TAGAP</i>       | T-cell activation RhoGTPase activating protein         | Cytoplasm           |
| <i>TCERG1L</i>     | Transcription elongation regulator 1-like              | Other               |
| <i>TREML4</i>      | Triggering receptor expressed on myeloid cells-like 4  | Other               |
| <i>TRMT44</i>      | tRNA methyltransferase 44 homolog (S. cerevisiae)      | Other               |
| <i>ZFYVE20</i>     | Zinc finger, FYVE domain containing 20                 | Cytoplasm           |
| <i>ZMYM4</i>       | Zinc finger, MYM-type 4                                | Other               |

**Supplementary Table 2. Continued.**

| ECNP-related genes | Description                                                              | Location        |
|--------------------|--------------------------------------------------------------------------|-----------------|
| <i>CAPN7</i>       | Calpain 7                                                                | Cytoplasm       |
| <i>PSMB2</i>       | Proteasome (prosome, macropain) subunit, beta type, 2                    | Cytoplasm       |
| <i>SYNJ2</i>       | Synaptojanin 2                                                           | Cytoplasm       |
| <i>ARID1B</i>      | AT rich interactive domain 1B (SWI1-like)                                | Nucleus         |
| <i>MYT1L</i>       | Myelin transcription factor 1-like                                       | Nucleus         |
| <i>NFYA</i>        | Nuclear transcription factor Y, alpha                                    | Nucleus         |
| <i>SPEN</i>        | Spn homolog, transcriptional regulator ( <i>Drosophila</i> )             | Nucleus         |
| <i>TULP4</i>       | Tubby like protein 4                                                     | Cytoplasm       |
| <i>NCR2</i>        | Natural cytotoxicity triggering receptor 2                               | Plasma membrane |
| <i>TLR4</i>        | Toll-like receptor 4                                                     | Plasma membrane |
| <i>OCA2</i>        | Oculocutaneous albinism II                                               | Plasma membrane |
| <i>SLC22A1</i>     | Solute carrier family 22 (organic cation transporter), member 1          | Plasma membrane |
| <i>SLC22A3</i>     | Solute carrier family 22 (extraneuronal monoamine transporter), member 3 | Plasma membrane |
| <i>SNX9</i>        | Sorting nexin 9                                                          | Cytoplasm       |

ESNP, ethnic variant single-nucleotide polymorphism; ECNP, ethnic variant copy number polymorphism.
