# Supplementary material for: Identification of Ethnically Specific Genetic Variations in Pan-Asian Ethnos
Source: PubMed Central journal article supplement — Genomics Inform. 2014 Mar 31;12(1):42–7. doi: 10.5808/GI.2014.12.1.42 (PMC3990765; doi:10.5808/gi.2014.12.1.42), 2014-03-31
Supplement: gni-12-42-s004.pdf [file gni-12-42-s004.pdf]

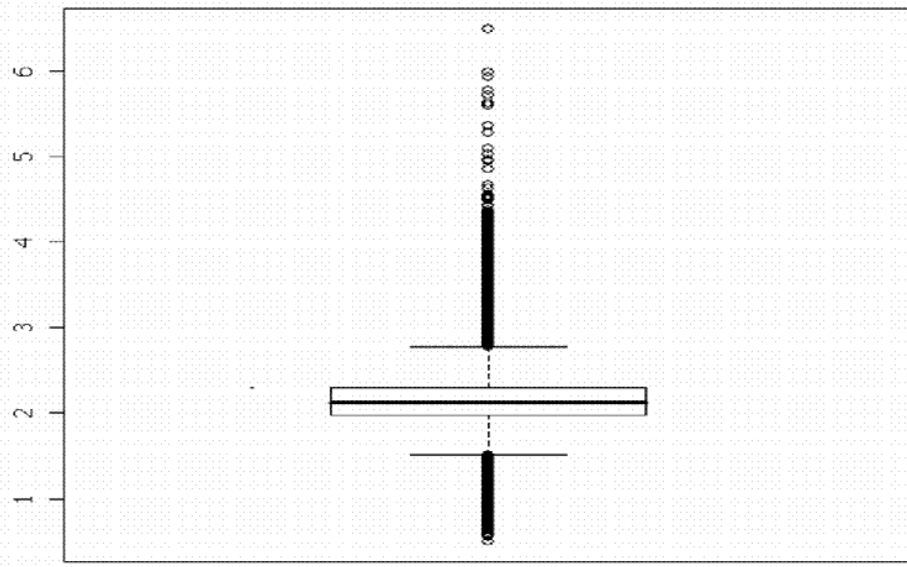

**Supplementary Fig. 1.** Distribution of Pan-Asian copy number values from Pan-Asian genotype profiling. It shows that discrete distribution of Pan-Asian single nucleotide polymorphism samples with lower boundary of 1.5065 and upper boundary of 2.7765.
