# Supplementary material for: Identification of Ethnically Specific Genetic Variations in Pan-Asian Ethnos
Source: PubMed Central journal article supplement — Genomics Inform. 2014 Mar 31;12(1):42–7. doi: 10.5808/GI.2014.12.1.42 (PMC3990765; doi:10.5808/gi.2014.12.1.42), 2014-03-31
Supplement: gni-12-42-s006.pdf [file gni-12-42-s006.pdf]

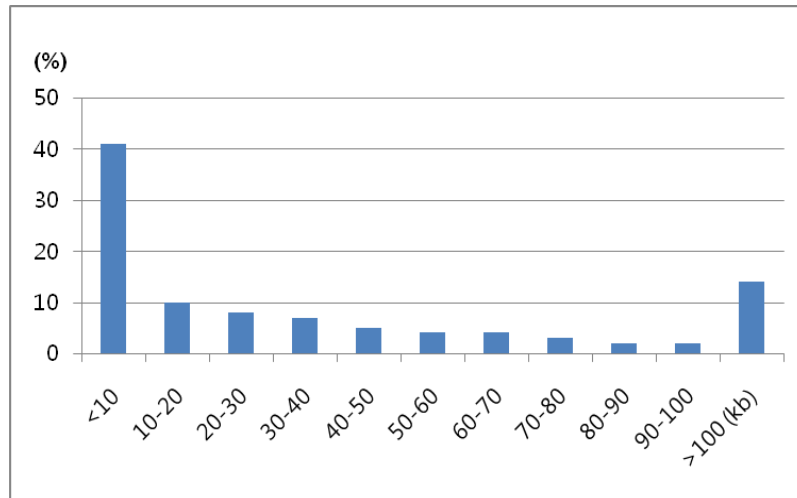

**Supplementary Fig. 3.** Inter-single nucleotide polymorphism (SNP) distance distribution. The X-axis represents the distance (kilo base pair) between SNPs and the Y-axis represents the proportion (%) of pan Asian SNPs.
