# Supplementary material for: Identification of Ethnically Specific Genetic Variations in Pan-Asian Ethnos
Source: PubMed Central journal article supplement — Genomics Inform. 2014 Mar 31;12(1):42–7. doi: 10.5808/GI.2014.12.1.42 (PMC3990765; doi:10.5808/gi.2014.12.1.42), 2014-03-31
Supplement: gni-12-42-s007.pdf [file gni-12-42-s007.pdf]

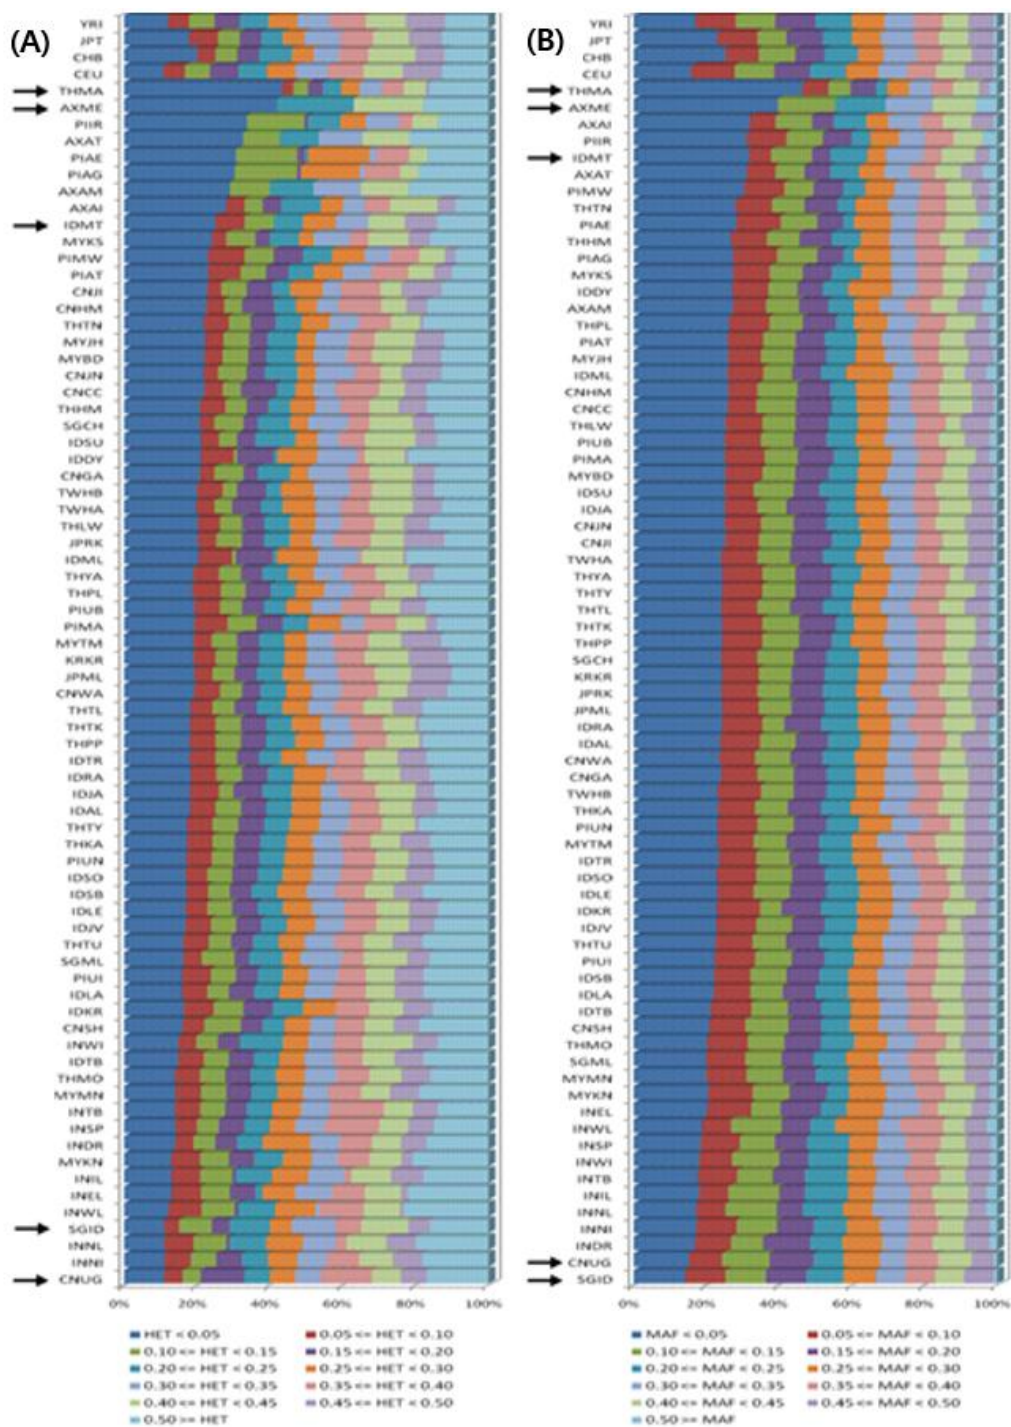

**Supplementary Fig. 4.** Minor allele frequency (MAF) and heterozygosity (HET) distribution of single nucleotide polymorphism (SNP) in the Pan-Asian SNP data. X-axis is Pan-Asian ethnic groups, and Y-axis is SNP proportion (%) for MAF in each range. We examined MAF and HET across ethnic groups and 4 HapMap groups together. We assigned SNP proportion (%) in each range for MAF and HET rate of Pan-Asia ethnic groups and 4 HapMap groups as shown in (A) and (B).
