# Supplementary material for: Identification of Ethnically Specific Genetic Variations in Pan-Asian Ethnos
Source: PubMed Central journal article supplement — Genomics Inform. 2014 Mar 31;12(1):42–7. doi: 10.5808/GI.2014.12.1.42 (PMC3990765; doi:10.5808/gi.2014.12.1.42), 2014-03-31
Supplement: gni-12-42-s008.pdf [file gni-12-42-s008.pdf]

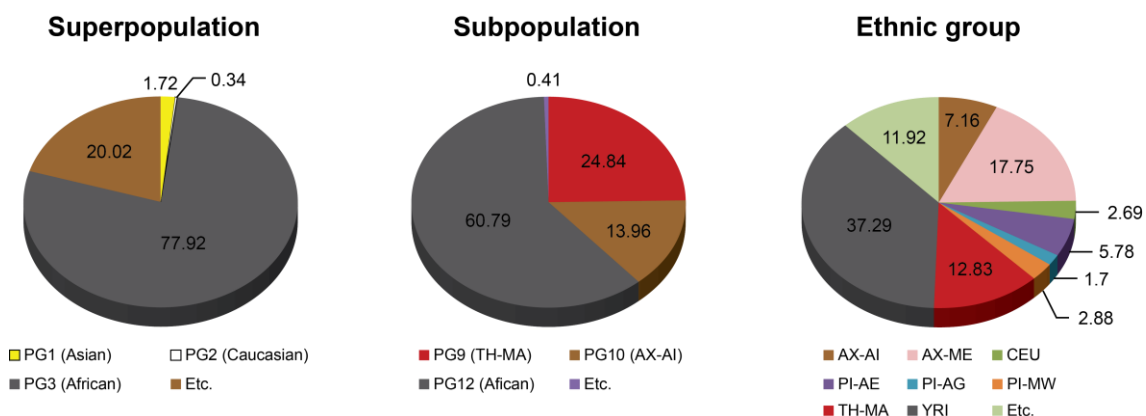

**Supplementary Fig. 5.** The distribution of ethnic variant single nucleotide polymorphisms (ESNPs) across Pan-Asian and HapMap ethnic groups. We analyzed the ethnicity-specific single-nucleotide polymorphisms, including the four HapMap groups (CEU, CHB, JPT, and YRI), for the following groups: super-populations (Asians, Caucasoids, American Indians, and outliers [IN-NI, IN-TB, and CN-UG]); 12 populations; and 76 ethnic groups (Pan-Asian and four HapMap ethnic groups). AX-AI, Karitiana; AX-ME, Ami; CEU, European; PI-AE, Ayta; PI-AG, Ayta; PI-MW, Mamanwa; TH-MA, Mlabri; YRI, Yoruba; CHB, Han; JPT, Japanese; IN-NI, Mongoloid features; IN-TB, Mongoloid features; CN-UG, Uyghur.
