# Supplementary material for: Identification of Ethnically Specific Genetic Variations in Pan-Asian Ethnos
Source: PubMed Central journal article supplement — Genomics Inform. 2014 Mar 31;12(1):42–7. doi: 10.5808/GI.2014.12.1.42 (PMC3990765; doi:10.5808/gi.2014.12.1.42), 2014-03-31
Supplement: gni-12-42-s009.pdf [file gni-12-42-s009.pdf]

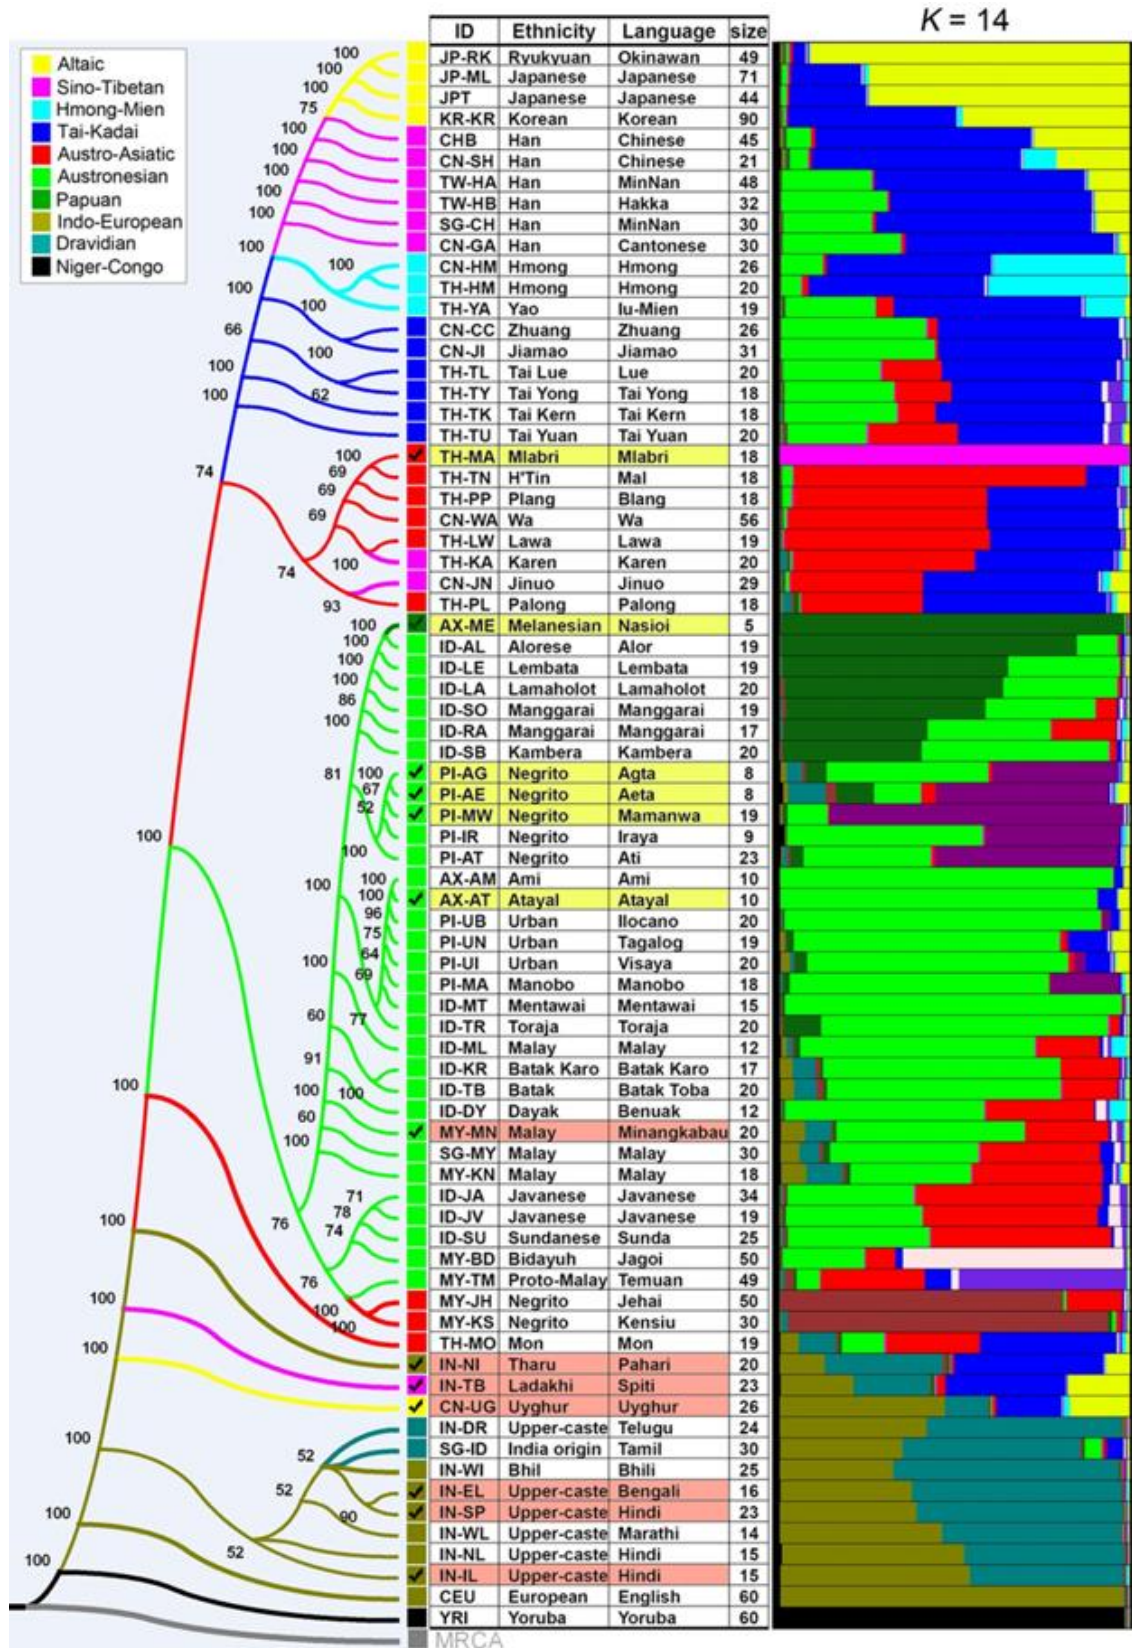

Supplementary Fig. 6. Representative ethnic groups having ethnically specific single nucleotide

polymorphismss and copy number polymorphisms on population structures. Yellow-colored row indicates the Pan-Asian ethnic groups having highly portion of ethnic variant single nucleotide polymorphisms and red-colored row indicates the Pan-Asian ethnic groups having highly portion of ethnic variant copy number polymorphisms. We marked the Pan-Asian ethnic groups based on a maximum-likelihood tree of populations. Abbreviations are explained in Supplementary Table 1.
